# Supplementary material for: Vegetation–soil–microbiota dynamics across a 50-year reconstructed grassland chronosequence on the Loess Plateau of China
Source: PeerJ. 2024 Dec 20;12:e18723. doi: 10.7717/peerj.18723 (PMC11665427; doi:10.7717/peerj.18723)
Supplement: Supplemental Information 9 [file peerj-12-18723-s009.xlsx]

## Sheet: Soil BD
	1	5	7	10	15	20	30	40	50
0-20	2.46	2.51	2.26	2.2	2.11	2. 09	1.94	2..03	2. 13
0-20	2.2	2.32	2.22	2.26	2.08	2.1	1.89	2	2.08
0-20	2.55	2.43	2.24	2.19	2.03	2.15	1.91	2.02	2.17
20-40	2.41	2. 11	2.21	2.33	2.02	2. 15	1.95	2. 10	2.24
20-40	2.38	2.02	2.23	2.61	2.11	2. 09	1.98	2. 02	2.26
20-40	2.39	2.2	2.19	2.5	2.01	2. 10	1.97	2. 18	2.19
40-60	2.28	2. 10	2. 17	2.5	2. 11	2. 10	2.01	2.05	2. 17
40-60	2.2	2. 14	2. 08	2.39	2. 14	2. 18	2.06	2.03	2. 09
40-60	2.19	2. 12	2. 20	2.58	2. 01	2. 12	2.11	2.07	2. 12

## Sheet:  total soil porpsity
	1	5	7	10	15	20	30	40	50
0-20	41.31	45.08	48.21	49.07	54.21	51.58	47.62	63.53	54.99
0-20	41.25	44.04	48.08	48.95	53.97	51.56	45.29	63.35	53.96
0-20	41.39	45.14	48.35	49.02	54.05	51.26	46.66	62.93	55.08
20-40	41.52	49.12	51.02	41.27	56.15	50.05	38.93	63.8	43.65
20-40	41.48	48.88	51	41.08	56.54	50.08	39.9	62.96	43.76
20-40	41.32	49.02	51.04	42.03	56.51	49.98	37.98	64.05	43.7
40-60	44.96	50.68	55.2	39.97	52.71	48.52	37.64	52.97	52.45
40-60	45.69	52.52	54.92	39.89	52.17	48.93	37.12	53.77	51.94
40-60	43.96	48.89	55.22	40.07	53.01	48.82	38	54.7	52

## Sheet: SW
	1	5	7	10	15	20	30	40	50
0-20	13.97	16.78	14.95	16.18	14.12	15.66	18.03	11	11.82
0-20	14.05	16.43	14.88	16.9	14.08	15.6	18.11	12.01	11.44
0-20	13.84	15.97	15.03	17.02	13.98	15.51	17.85	11.26	11.49
20-40	13	15.17	14.53	16.16	10.94	15.2	13.67	13.56	14.36
20-40	13.03	15	14.6	16.25	10.87	14.96	13.5	13.2	14.3
20-40	12.93	14.83	14.46	15.96	11.06	15.26	14.02	13.78	13.99
40-60	15.87	14.45	13.32	13.95	5.82	13.85	10.3	14.15	16.1
40-60	15.02	14.74	13.4	13.83	5.77	14	10.21	14.02	16.11
40-60	16.07	14.6	13.36	14.13	6.1	14.05	10.45	14.03	16.32
60-80	20.16	15.05	10.22	14.86	4.06	14.12	8.02	15.72	15.63
60-80	20.62	14.82	10.1	14.66	3.82	14.65	7.08	15.88	15.57
60-80	20.5	15.02	10.16	14.64	4.55	14.5	8	15.8	15.15
80-100	19.54	15.33	9.66	14.73	2.76	14.8	9.11	14.32	16.48
80-100	19.62	15.37	9.45	14.54	3.01	14.76	9.31	14.61	16.66
80-100	19.57	15.74	9.5	15.1	2.46	14.8	8.89	14.5	16.6

## Sheet: FC
	1	5	7	10	15	20	30	40	50
0-20	15.85	13.21	16.85	8.4	18.01	16.55	11.85	18.93	18.31
0-20	15.63	13.47	16.77	8.24	18.88	16.34	11.21	18.59	18.55
0-20	15.32	13.59	17.06	8.45	17.65	16.87	11.84	18.39	17.78
20-40	13.07	13.28	16.39	10.21	20.17	16.54	11.2	18.5	17.89
20-40	13.85	13.17	16.85	10.48	20.07	16.39	10.97	18.42	17.87
20-40	12.97	13.33	16.05	10.39	29.97	16.05	11.17	18.38	18.05
40-60	14.5	18.29	14.38	6.8	17.42	19.98	10.21	18.26	16.22
40-60	14.33	18.44	14.27	6.79	17.45	20.86	10.19	18.25	17.05
40-60	14.56	18.58	14	7.12	17.98	21.05	9.82	18.79	16.19

## Sheet: TOC
	1	5	7	10	15	20	30	40	50
0-20	23.5	25.58	24.29	26.52	27.78	20.17	18.39	21.23	16.58
0-20	23.15	25.21	24.38	26.12	27.87	20.18	18.45	21.89	15.83
0-20	23.27	25.01	23.98	27.05	27.12	19.98	18.18	21.21	16.03
20-40	18.25	23.08	17.48	20.35	23.61	17.95	18.17	13.85	11.03
20-40	18.2	23.24	17.6	19.69	23.58	18.03	18.26	13.25	11.08
20-40	17.89	23.36	17	20.14	23.44	17.93	18.08	13.12	10.85
40-60	16.83	19.5	16.35	17.24	17.93	13.66	10.78	12.69	13.8
40-60	16.45	19.12	16.08	16.87	17.39	14.08	11.12	12.58	12.59
40-60	17.13	20.08	16.12	17.24	17.48	13.45	10.29	12.03	13.79
60-80	20.58	20.5	17.38	17.58	17.28	13.2	13.48	16.55	13.96
60-80	20.25	20.42	17.25	17.35	17.39	13.27	13.51	15.98	14.08
60-80	20.3	20.15	17.19	17.69	17.58	12.98	13.04	15.77	13.49
80-100	15.2	18.12	17.35	17.39	15.19	14.48	16.58	11.05	16.89
80-100	15.01	18.08	17.39	17.58	16.06	14.58	16.2	11.38	17.11
80-100	14.23	17.91	17.84	17.24	15.86	14.34	16.98	11.5	16.28

## Sheet: TN
	1	5	7	10	15	20	30	40	50
0-20	0.69	0.74	0.73	1.32	0.69	0.65	0.56	0.35	0.11
0-20	0.75	0.65	0.75	1.09	0.72	0.68	0.65	0.48	0.14
0-20	0.58	0.71	0.78	1.44	0.7	0.65	0.56	0.41	0.09
20-40	0.65	0.54	0.47	1.25	0.41	0.44	0.31	0.29	0.29
20-40	0.78	0.49	0.53	1.09	0.49	0.42	0.27	0.27	0.35
20-40	0.54	0.46	0.56	1.38	0.32	0.4	0.24	0.32	0.2
40-60	0.65	0.68	0.63	0.81	0.37	0.35	0.31	0.29	0.27
40-60	0.59	0.64	0.68	0.74	0.4	0.37	0.35	0.3	0.35
40-60	0.7	0.65	0.54	0.69	0.35	0.33	0.29	0.32	0.25
60-80	0.34	0.45	0.68	0.56	0.32	0.45	0.54	0.18	0.31
60-80	0.38	0.47	0.6	0.5	0.29	0.48	0.37	0.21	0.29
60-80	0.3	0.45	0.72	0.62	0.37	0.42	0.54	0.24	0.24
80-100	0.66	0.39	0.61	0.47	0.26	0.37	0.62	0.38	0.32
80-100	0.68	0.41	0.59	0.38	0.28	0.42	0.44	0.44	0.25
80-100	0.71	0.35	0.64	0.51	0.3	0.39	0.51	0.34	0.39

## Sheet: TK
	1	5	7	10	15	20	30	40	50
0-20	13.08	13.45	12.58	13.15	12.75	12.14	12.05	11.05	12.69
0-20	19.82	13.56	12.36	13.21	12.77	11.55	12.07	11.77	12.57
0-20	13.12	12.78	12.24	19.98	12.71	12.05	11.77	12.12	12.45
20-40	12.58	11.58	12.51	12.03	11.75	11.35	12.06	11.36	11.61
20-40	12.74	11.35	12.21	12.55	11.52	11.41	11.62	11.3	11.58
20-40	13.01	11.6	11.58	11.05	11.89	11.02	11.39	11.11	11.68
40-60	13.05	12.28	12.58	11.94	12.13	12.05	11.04	11.23	12.4
40-60	13.48	12.39	12.85	11.32	12.18	11.91	11.27	10.87	12.21
40-60	12.72	12.58	13.05	12.14	12.27	11.28	11.48	11.09	12.59
60-80	13.58	11.3	12.87	13.12	10.99	11.47	11.63	11.53	11.38
60-80	13.65	11.58	12.8	13	11.23	11.51	11.98	11.38	11.85
60-80	13.18	11.12	12.93	12.72	10.2	11.38	11.03	11.53	11.75
80-100	12.58	13.48	11.91	11.97	12.58	11.47	11.18	11.17	11.76
80-100	12.63	13.29	12.08	12.03	11.97	11.35	11.07	11.45	12.08
80-100	12.55	13.18	11.87	11.85	12.38	11.36	10.54	11.28	12.26

## Sheet: TP
	1	5	7	10	15	20	30	40	50
0-20	0.65	0.81	0.81	0.75	0.67	0.62	0.45	0.56	0.44
0-20	0.74	0.79	0.74	0.74	0.75	0.58	0.51	0.53	0.55
0-20	0.81	0.75	0.8	0.71	0.67	0.6	0.55	0.49	0.49
20-40	0.61	0.75	0.72	0.57	0.63	0.57	0.5	0.52	0.37
20-40	0.7	0.73	0.74	0.55	0.6	0.61	0.55	0.48	0.4
20-40	0.55	0.68	0.74	0.6	0.58	0.51	0.46	0.5	0.37
40-60	0.63	0.7	0.67	0.71	0.57	0.58	0.39	0.48	0.45
40-60	0.59	0.65	0.65	0.67	0.55	0.62	0.42	0.47	0.42
40-60	0.66	0.67	0.67	0.65	0.61	0.51	0.5	0.51	0.39
60-80	0.67	0.64	0.62	0.68	0.48	0.56	0.45	0.52	0.43
60-80	0.53	0.62	0.6	0.7	0.53	0.52	0.51	0.47	0.45
60-80	0.61	0.52	0.61	0.65	0.51	0.61	0.47	0.5	0.39
80-100	0.51	0.42	0.45	0.57	0.41	0.42	0.47	0.42	0.41
80-100	0.47	0.44	0.43	0.65	0.47	0.43	0.52	0.49	0.39
80-100	0.44	0.41	0.43	0.49	0.43	0.45	0.45	0.43	0.5

## Sheet: PH
	1	5	7	10	15	20	30	40	50
0-20	8.24	8.46	8.38	8.52	8.52	8.52	8.48	8.78	8.72
0-20	8.12	8.32	8.28	8.89	8.42	8.21	8.42	8.37	8.7
0-20	7.98	8.01	7.77	7.69	8.05	8.39	8.32	8.31	8.59
20-40	8.52	8.84	8.89	8.6	8.48	8.58	8.29	8.73	8.71
20-40	8.59	8.69	8.38	8.88	8.55	8.68	8.31	8.95	8.59
20-40	8.68	8.23	8.01	8.14	8.21	8.1	8.89	8.73	8.71
40-60	8.61	8.35	8.12	8.67	8.62	8.61	8.59	8.57	8.89
40-60	8.72	8.29	8.78	8.62	8.39	8.78	8.42	8.02	8.45
40-60	8.01	8.04	9.05	8.87	8.24	7.98	8.23	8.22	8.73
60-80	8.02	8.14	8.58	8.8	8.47	8.47	8.34	8.14	8.63
60-80	8.45	8.05	8.98	8.45	8.05	8.5	8.89	8.15	8.28
60-80	7.85	8.28	8.01	8.99	8.41	8.98	8.72	8.19	8.98
80-100	8.42	8.53	8.58	9.56	8.68	8.71	8.08	8.74	8.24
80-100	8.52	8.68	9.02	8.45	8.61	8.8	8.77	8.26	8.71
80-100	8.33	8.45	8.04	8.32	8.52	7.98	8.99	8.74	8.85

## Sheet: soil available potassium 
	1	5	7	10	15	20	30	40	50
0-20	110.2	111.53	103.54	103.91	106.31	110.02	107.15	107.32	105.18
0-20	108.9	110.53	103.32	104.07	105.56	110.59	106.89	10.98	104.98
0-20	113.5	108.98	103.48	103.87	106.89	109.02	107.05	107.48	105.13
20-40	108.95	108.89	103.39	103.82	104.27	106.51	105.52	105.4	105.61
20-40	108.87	109.05	103.28	104.12	104.33	105.21	105.46	105.58	106.02
20-40	107.23	108.9	102.59	103.05	104.15	105.81	104.8	105.32	105.21
40-60	108.25	110.26	102.17	94.8	99.02	109.55	104.56	98.26	103.61
40-60	107.64	110.3	101.89	94.56	99.38	110.32	104.62	98.32	103.55
40-60	109.01	108.88	102.05	94.32	98.52	109.25	104.89	98.02	103.69
60-80	108.28	109.15	103.18	102.6	103.78	109.8	106.33	104.7	104.8
60-80	107.73	109.78	103.21	102.74	104.8	110.12	106.48	104.58	104.87
60-80	107.33	110.05	103.2	101.91	104.82	109.02	106.19	104.81	105.04
80-100	108.62	108.58	101.87	102.34	105.98	107.24	106.65	104.98	104.58
80-100	107.96	108.52	101.92	102.55	106.98	107.08	106.78	105.01	105.07
80-100	108.62	108.35	100.98	102.34	105.58	107.41	106.73	105.2	104.03

[truncated: 2 more sheets: ASN, Soil enzyme activities]
